# Supplementary material for: Complete chloroplast genomes from apomictic Taraxacum (Asteraceae): Identity and variation between three microspecies
Source: PLoS One. 2017 Feb 9;12(2):e0168008. doi: 10.1371/journal.pone.0168008 (PMC5300115; doi:10.1371/journal.pone.0168008)
Supplement: S2 Table — Absolute numbers and values recalculated as per mille (1/1000) and proportion are shown with a heat map gives relative usage of each codon. (XLSX) [file pone.0168008.s006.xlsx]

## Sheet: Sheet1
		Number																					/1000																					Fraction
AmAcid	Codon	Taraxacum obtusifrons (O978)	Taraxacum amplum (A978)	Ageratina adenophora	Artemisia frigida	Artemisia montana	Aster spathulifolius	Carthamus tinctorius	Centaurea diffusa	Chrysanthemum indicum	Chrysanthemum X Morifolium	Cynara cardunculus	Guizotia abyssinica	Lactuca sativa var. salinas	Lactuca sativa	Lathenia burkei	Helianthus annuus	Jacobaea vulgaris	Leontopodium leiolepis	Parthenium argentatum	Praxelis clematidea		Taraxacum obtusifrons (O978)	Taraxacum amplum (A978)	Ageratina adenophora	Artemisia frigida	Artemisia montana	Aster spathulifolius	Carthamus tinctorius	Centaurea diffusa	Chrysanthemum indicum	Chrysanthemum X Morifolium	Cynara cardunculus	Guizotia abyssinica	Lactuca sativa var. salinas	Lactuca sativa	Lathenia burkei	Helianthus annuuus	Jacobaea vulgaris	Leontopodium leiolepis	Parthenium argentatum	Praxelis clematidea		Taraxacum obtusifrons (O978)	Taraxacum amplum (A978)	Ageratina adenophora	Artemisia frigida	Artemisia montana	Aster spathulifolius
Ala	GCG	135	122	118	150	154	138	123	118	117	156	117	125	159	153	107	129	123	131	108	132		5.15	4.65	5.61	4.9	5.9	5.67	5.6	5.16	5.52	6.33	5.52	5.52	6.05	5.89	4.72	5.73	5.56	5.79	5.27	7.16		0.15	0.17	0.12	0.14	0.11	0.14
Ala	GCA	286	241	236	276	412	247	202	213	232	402	232	242	387	399	229	243	227	371	238	337		10.9	9.18	11.21	9.02	15.79	10.14	9.2	9.31	10.94	16.32	10.94	10.69	14.73	15.37	10.1	10.8	10.25	16.4	11.61	18.27		0.32	0.33	0.25	0.26	0.29	0.24
Ala	GCT	312	220	388	390	616	413	338	357	391	607	391	397	603	622	319	402	395	582	292	528		11.89	8.38	18.43	12.74	23.6	16.96	15.4	15.61	18.44	24.64	18.44	17.53	22.94	23.96	14.06	17.86	17.84	25.73	14.24	28.63		0.35	0.3	0.41	0.37	0.44	0.41
Ala	GCC	169	151	206	240	226	214	208	204	203	222	203	211	214	219	191	208	210	197	144	191		6.44	5.75	9.79	7.84	8.66	8.79	9.48	8.92	9.57	9.01	9.57	9.32	8.14	8.44	8.42	9.24	9.48	8.71	7.02	10.36		0.19	0.21	0.22	0.23	0.16	0.21
Cys	TGT	432	448	230	378	200	265	257	268	224	196	224	240	227	211	291	237	226	179	268	163		16.47	17.06	10.93	12.35	7.66	10.88	11.71	11.72	10.56	7.96	10.56	10.6	8.64	8.13	12.83	10.53	10.21	7.91	13.07	8.84		0.55	0.55	0.56	0.57	0.7	0.56
Cys	TGC	352	366	178	285	86	207	212	218	187	80	187	186	111	75	212	188	194	65	223	45		13.42	13.94	8.46	9.31	3.3	8.5	9.66	9.53	8.82	3.25	8.82	8.21	4.22	2.89	9.35	8.35	8.76	2.87	10.88	2.44		0.45	0.45	0.44	0.43	0.3	0.44
Asp	GAT	608	521	584	716	859	671	498	575	601	813	601	638	806	842	553	641	607	715	457	551		23.18	19.85	27.74	23.39	32.91	27.56	22.69	25.15	28.35	33	28.35	28.18	30.67	32.44	24.38	28.49	27.42	31.61	22.29	29.87		0.74	0.71	0.78	0.74	0.8	0.79
Asp	GAC	216	212	160	254	213	174	167	172	151	202	151	166	200	202	172	173	163	170	157	147		8.23	8.08	7.6	8.3	8.16	7.15	7.61	7.52	7.12	8.2	7.12	7.33	7.61	7.78	7.58	7.69	7.36	7.52	7.66	7.97		0.26	0.29	0.22	0.26	0.2	0.21
Glu	GAG	310	296	235	394	343	279	221	235	227	321	227	250	339	357	224	246	240	285	252	208		11.82	11.27	11.16	12.87	13.14	11.46	10.07	10.28	10.71	13.03	10.71	11.04	12.9	13.75	9.88	10.93	10.84	12.6	12.29	11.28		0.32	0.32	0.26	0.3	0.26	0.25
Glu	GAA	669	632	671	930	992	818	658	661	676	904	676	783	1003	984	726	772	734	898	544	689		25.5	24.07	31.88	30.38	38.01	33.59	29.98	28.91	31.88	36.7	31.88	34.58	38.16	37.91	32.01	34.31	33.15	39.71	26.53	37.36		0.68	0.68	0.74	0.7	0.74	0.75
Phe	TTT	1098	1102	788	1204	976	947	879	901	806	892	806	871	1009	962	907	859	867	874	849	702		41.86	41.98	37.43	39.33	37.4	38.89	40.05	39.4	38.01	36.21	38.01	38.47	38.39	37.06	39.99	38.17	39.16	38.65	41.41	38.06		0.64	0.62	0.6	0.63	0.66	0.62
Phe	TTC	619	668	518	707	501	575	547	644	506	491	506	540	516	520	566	523	525	414	447	310		23.6	25.44	24.61	23.09	19.2	23.61	24.92	28.16	23.86	19.93	23.86	23.85	19.63	20.03	24.95	23.24	23.71	18.31	21.8	16.81		0.36	0.38	0.4	0.37	0.34	0.38
Gly	GGG	371	381	209	338	300	250	237	236	217	294	217	217	300	285	218	210	210	251	289	231		14.14	14.51	9.93	11.04	11.5	10.27	10.8	10.32	10.23	11.93	10.23	9.58	11.42	10.98	9.61	9.33	9.48	11.1	14.1	12.52		0.24	0.27	0.16	0.22	0.17	0.18
Gly	GGA	567	481	471	527	694	534	452	432	484	673	484	504	677	686	425	509	484	609	394	523		21.61	18.32	22.38	17.21	26.59	21.93	20.6	18.89	22.83	27.32	22.83	22.26	25.76	26.43	18.74	22.62	21.86	26.93	19.22	28.36		0.37	0.33	0.37	0.35	0.39	0.38
Gly	GGT	389	343	430	405	580	437	376	373	419	567	419	438	573	575	361	449	428	530	301	472		14.83	13.07	20.43	13.23	22.22	17.95	17.13	16.31	19.76	23.02	19.76	19.34	21.8	22.15	15.92	19.95	19.33	23.43	14.68	25.59		0.25	0.24	0.34	0.27	0.33	0.31
Gly	GGC	225	232	164	243	188	173	195	193	168	186	168	173	213	194	168	170	159	179	162	163		8.58	8.84	7.79	7.94	7.2	7.1	8.89	8.44	7.92	7.55	7.92	7.64	8.1	7.47	7.41	7.55	7.18	7.91	7.9	8.84		0.14	0.16	0.13	0.16	0.11	0.12
His	CAT	420	393	398	631	465	429	435	477	380	444	380	401	471	463	371	399	396	382	310	328		16.01	14.97	18.91	20.61	17.82	17.62	19.82	20.86	17.92	18.02	17.92	17.71	17.92	17.84	16.36	17.73	17.89	16.89	15.12	17.78		0.73	0.68	0.76	0.76	0.76	0.76
His	CAC	156	188	127	202	145	139	120	133	122	139	122	129	160	150	131	127	130	129	132	105		5.95	7.16	6.03	6.6	5.56	5.71	5.47	5.82	5.75	5.64	5.75	5.7	6.09	5.78	5.78	5.64	5.87	5.7	6.44	5.69		0.27	0.32	0.24	0.24	0.24	0.24
Ile	ATA	537	522	567	786	696	677	570	622	569	642	569	622	669	696	609	612	607	612	459	489		20.47	19.88	26.94	25.67	26.67	27.8	25.97	27.2	26.84	26.06	26.84	27.47	25.46	26.81	26.85	27.2	27.42	27.06	22.39	26.51		0.28	0.27	0.31	0.34	0.32	0.31
Ile	ATT	961	930	813	950	1074	956	830	902	828	1020	828	886	1071	1068	801	864	853	952	747	791		36.63	35.42	38.62	31.03	41.15	39.26	37.82	39.45	39.05	41.4	39.05	39.13	40.75	41.14	35.32	38.39	38.53	42.09	36.44	42.89		0.49	0.47	0.45	0.42	0.49	0.44
Ile	ATC	446	511	429	550	428	517	494	523	411	411	411	443	453	430	446	447	426	361	376	304		17	19.46	20.38	17.97	16.4	21.23	22.51	22.87	19.38	16.68	19.38	19.57	17.24	16.57	19.66	19.86	19.24	15.96	18.34	16.48		0.23	0.26	0.24	0.24	0.19	0.24
Lys	AAG	440	456	317	591	364	421	365	410	330	325	330	366	345	359	404	371	359	285	349	183		16.77	17.37	15.06	19.3	13.95	17.29	16.63	17.93	15.56	13.19	15.56	16.16	13.13	13.83	17.81	16.49	16.21	12.6	17.02	9.92		0.31	0.32	0.3	0.34	0.26	0.31
Lys	AAA	993	973	749	1151	1020	950	859	872	760	896	760	875	1030	1011	938	870	869	892	713	653		37.85	37.06	35.58	37.6	39.08	39.01	39.14	38.13	35.84	36.37	35.84	38.64	39.19	38.95	41.36	38.66	39.25	39.44	34.78	35.4		0.69	0.68	0.7	0.66	0.74	0.69
Leu	TTG	502	545	535	686	580	599	497	573	531	553	531	560	555	593	623	557	554	507	480	399		19.14	20.76	25.42	22.41	22.22	24.6	22.65	25.06	25.04	22.45	25.04	24.73	21.12	22.84	27.47	24.75	25.02	22.42	23.41	21.63		0.22	0.23	0.27	0.22	0.21	0.26
Leu	TTA	646	556	509	749	877	580	468	394	544	821	544	570	824	845	534	581	569	782	537	663		24.63	21.18	24.18	24.47	33.6	23.82	21.32	17.23	25.66	33.33	25.66	25.17	31.35	32.55	23.54	25.82	25.7	34.58	26.19	35.95		0.28	0.24	0.26	0.23	0.31	0.25
Leu	CTG	143	178	144	321	194	195	157	171	160	183	160	163	167	182	203	166	159	139	175	109		5.45	6.78	6.84	10.49	7.43	8.01	7.15	7.48	7.55	7.43	7.55	7.2	6.35	7.01	8.95	7.38	7.18	6.15	8.54	5.91		0.06	0.08	0.07	0.1	0.07	0.08
Leu	CTA	300	334	214	510	362	239	199	184	208	344	208	246	346	377	294	248	229	324	266	251		11.44	12.72	10.17	16.66	13.87	9.81	9.07	8.05	9.81	13.96	9.81	10.86	13.17	14.52	12.96	11.02	10.34	14.33	12.97	13.61		0.13	0.14	0.11	0.16	0.13	0.1
Leu	CTT	528	509	393	614	617	504	387	401	434	592	434	447	581	607	411	443	446	529	438	410		20.13	19.39	18.67	20.06	23.64	20.7	17.63	17.54	20.47	24.03	20.47	19.74	22.11	23.38	18.12	19.69	20.14	23.39	21.36	22.23		0.23	0.22	0.2	0.19	0.22	0.21
Leu	CTC	182	224	179	308	190	231	182	203	178	182	178	187	183	185	233	187	178	139	202	115		6.94	8.53	8.5	10.06	7.28	9.49	8.29	8.88	8.4	7.39	8.4	8.26	6.96	7.13	10.27	8.31	8.04	6.15	9.85	6.24		0.08	0.1	0.09	0.1	0.07	0.1
Met	ATG	464	473	497	502	625	574	418	467	503	590	503	534	577	620	484	530	529	534	429	436		17.69	18.02	23.61	16.4	23.95	23.57	19.05	20.42	23.72	23.95	23.72	23.58	21.96	23.88	21.34	23.55	23.89	23.61	20.92	23.64		1	1	1	1	1	1
Asn	AAT	997	914	789	993	999	949	795	903	814	887	814	903	976	997	834	911	899	863	653	625		38.01	34.82	37.48	32.44	38.28	38.97	36.22	39.49	38.39	36.01	38.39	39.88	37.14	38.41	36.77	40.48	40.6	38.16	31.85	33.89		0.71	0.68	0.75	0.69	0.78	0.76
Asn	AAC	410	423	269	438	286	302	321	334	262	267	262	287	295	288	299	281	288	230	292	172		15.63	16.11	12.78	14.31	10.96	12.4	14.63	14.61	12.36	10.84	12.36	12.68	11.22	11.09	13.18	12.49	13.01	10.17	14.24	9.33		0.29	0.32	0.25	0.31	0.22	0.24
Pro	CCG	131	154	113	243	160	138	121	114	120	150	120	129	164	162	146	131	101	140	164	117		4.99	5.87	5.37	7.94	6.13	5.67	5.51	4.99	5.66	6.09	5.66	5.7	6.24	6.24	6.44	5.82	4.56	6.19	8	6.34		0.14	0.17	0.12	0.17	0.14	0.13
Pro	CCA	299	311	312	491	322	376	333	352	317	300	317	337	319	326	320	332	341	268	247	215		11.4	11.85	14.82	16.04	12.34	15.44	15.17	15.39	14.95	12.18	14.95	14.88	12.14	12.56	14.11	14.75	15.4	11.85	12.05	11.66		0.33	0.34	0.34	0.34	0.29	0.35
Pro	CCT	278	255	290	389	437	329	253	259	306	419	306	312	422	416	281	307	288	372	242	318		10.6	9.71	13.78	12.71	16.74	13.51	11.53	11.33	14.43	17.01	14.43	13.78	16.06	16.03	12.39	13.64	13.01	16.45	11.8	17.24		0.31	0.28	0.32	0.27	0.4	0.3
Pro	CCC	196	196	197	308	186	245	191	207	191	174	191	214	188	186	220	215	200	168	146	136		7.47	7.47	9.36	10.06	7.13	10.06	8.7	9.05	9.01	7.06	9.01	9.45	7.15	7.17	9.7	9.55	9.03	7.43	7.12	7.37		0.22	0.21	0.22	0.22	0.17	0.23
Gln	CAG	179	223	157	327	230	186	144	175	176	218	176	168	220	231	180	165	168	191	190	148		6.82	8.49	7.46	10.68	8.81	7.64	6.56	7.65	8.3	8.85	8.3	7.42	8.37	8.9	7.94	7.33	7.59	8.45	9.27	8.02		0.26	0.3	0.23	0.32	0.24	0.23
Gln	CAA	517	522	522	692	724	632	534	552	527	670	527	573	725	725	521	566	551	624	462	490		19.71	19.88	24.8	22.6	27.74	25.95	24.33	24.14	24.85	27.2	24.85	25.31	27.59	27.93	22.97	25.15	24.89	27.59	22.53	26.57		0.74	0.7	0.77	0.68	0.76	0.77
Arg	AGG	397	397	196	350	171	217	229	257	195	164	195	205	199	178	217	201	199	136	272	103		15.13	15.12	9.31	11.43	6.55	8.91	10.43	11.24	9.2	6.66	9.2	9.05	7.57	6.86	9.57	8.93	8.99	6.01	13.27	5.58		0.2	0.2	0.16	0.18	0.11	0.15
Arg	AGA	683	686	395	570	472	491	452	440	372	435	372	440	511	472	463	431	430	414	428	305		26.04	26.13	18.76	18.62	18.09	20.16	20.6	19.24	17.54	17.66	17.54	19.43	19.44	18.18	20.41	19.15	19.42	18.31	20.88	16.54		0.35	0.35	0.32	0.29	0.3	0.34
Arg	CGG	189	218	108	253	121	119	120	132	111	117	111	113	121	117	129	120	106	100	152	77		7.2	8.3	5.13	8.26	4.64	4.89	5.47	5.77	5.24	4.75	5.24	4.99	4.6	4.51	5.69	5.33	4.79	4.42	7.41	4.17		0.1	0.11	0.09	0.13	0.08	0.08
Arg	CGA	324	322	216	326	340	259	221	212	209	318	209	224	346	334	237	230	221	303	259	258		12.35	12.27	10.26	10.65	13.03	10.64	10.07	9.27	9.86	12.91	9.86	9.89	13.17	12.87	10.45	10.22	9.98	13.4	12.63	13.99		0.16	0.16	0.17	0.17	0.22	0.18
Arg	CGT	238	206	222	284	347	249	220	210	222	336	222	231	336	337	218	234	222	307	189	277		9.07	7.85	10.55	9.28	13.3	10.23	10.02	9.18	10.47	13.64	10.47	10.2	12.78	12.98	9.61	10.4	10.03	13.57	9.22	15.02		0.12	0.1	0.18	0.15	0.22	0.17
Arg	CGC	147	138	103	162	105	115	106	121	102	95	102	112	108	112	98	103	112	87	102	71		5.6	5.26	4.89	5.29	4.02	4.72	4.83	5.29	4.81	3.86	4.81	4.95	4.11	4.31	4.32	4.58	5.06	3.85	4.98	3.85		0.07	0.07	0.08	0.08	0.07	0.08
Ser	AGT	440	385	369	376	412	410	356	389	364	390	364	374	394	399	324	376	379	349	262	279		16.77	14.66	17.53	12.28	15.79	16.84	16.22	17.01	17.17	15.83	17.17	16.52	14.99	15.37	14.29	16.71	17.12	15.43	12.78	15.13		0.16	0.15	0.2	0.15	0.21	0.2
Ser	AGC	343	345	269	311	119	268	304	330	250	112	250	262	135	114	247	261	264	100	211	77		13.08	13.14	12.78	10.16	4.56	11.01	13.85	14.43	11.79	4.55	11.79	11.57	5.14	4.39	10.89	11.6	11.92	4.42	10.29	4.17		0.13	0.13	0.15	0.12	0.06	0.13
Ser	TCG	326	334	196	302	165	223	228	237	190	158	190	203	186	173	230	192	197	127	212	93		12.43	12.72	9.31	9.86	6.32	9.16	10.39	10.36	8.96	6.41	8.96	8.97	7.08	6.66	10.14	8.53	8.9	5.62	10.34	5.04		0.12	0.13	0.11	0.12	0.08	0.11
Ser	TCA	592	579	218	524	411	245	266	187	229	386	229	252	434	408	368	247	246	353	389	263		22.57	22.05	10.36	17.12	15.75	10.06	12.12	8.18	10.8	15.67	10.8	11.13	16.51	15.72	16.23	10.98	11.11	15.61	18.97	14.26		0.22	0.22	0.12	0.21	0.2	0.12
Ser	TCT	604	565	450	602	579	519	477	473	441	547	441	477	623	596	496	471	475	515	430	408		23.02	21.52	21.38	19.66	22.19	21.31	21.73	20.68	20.8	22.2	20.8	21.07	23.71	22.96	21.87	20.93	21.45	22.77	20.97	22.12		0.22	0.22	0.24	0.24	0.29	0.26
Ser	TCC	434	406	336	431	322	359	400	432	332	302	332	337	335	332	341	336	341	248	273	184		16.54	15.46	15.96	14.08	12.34	14.74	18.23	18.89	15.66	12.26	15.66	14.88	12.75	12.79	15.03	14.93	15.4	10.97	13.32	9.98		0.16	0.16	0.18	0.17	0.16	0.18
Thr	ACG	185	186	176	239	125	197	188	216	177	123	177	186	138	130	164	186	185	96	133	87		7.05	7.08	8.36	7.81	4.79	8.09	8.57	9.45	8.35	4.99	8.35	8.21	5.25	5.01	7.23	8.27	8.36	4.24	6.49	4.72		0.14	0.16	0.15	0.17	0.1	0.15
Thr	ACA	448	430	270	438	408	317	299	262	279	386	279	300	419	401	289	299	302	353	298	294		17.08	16.38	12.83	14.31	15.63	13.02	13.62	11.46	13.16	15.67	13.16	13.25	15.94	15.45	12.74	13.29	13.64	15.61	14.54	15.94		0.35	0.36	0.24	0.3	0.31	0.25
Thr	ACT	391	321	419	397	529	461	387	423	422	513	422	440	505	527	338	432	419	472	307	405		14.9	12.23	19.9	12.97	20.27	18.93	17.63	18.5	19.9	20.82	19.9	19.43	19.22	20.3	14.9	19.2	18.92	20.87	14.97	21.96		0.3	0.27	0.36	0.27	0.41	0.36
Thr	ACC	266	253	283	372	238	304	341	369	299	237	299	291	249	234	293	290	298	211	189	185		10.14	9.64	13.44	12.15	9.12	12.48	15.54	16.14	14.1	9.62	14.1	12.85	9.47	9.01	12.92	12.89	13.46	9.33	9.22	10.03		0.21	0.21	0.25	0.26	0.18	0.24
Val	GTG	132	155	155	259	184	177	160	165	153	186	153	157	182	192	173	155	148	159	169	147		5.03	5.9	7.36	8.46	7.05	7.27	7.29	7.22	7.22	7.55	7.22	6.93	6.93	7.4	7.63	6.89	6.68	7.03	8.24	7.97		0.14	0.16	0.15	0.18	0.13	0.15
Val	GTA	280	282	348	443	535	374	337	344	363	519	363	369	489	508	363	366	357	478	328	435		10.67	10.74	16.53	14.47	20.5	15.36	15.36	15.04	17.12	21.07	17.12	16.3	18.61	19.57	16	16.26	16.12	21.14	16	23.58		0.3	0.29	0.33	0.31	0.39	0.32
Val	GTT	386	375	386	487	503	442	347	368	400	486	400	403	504	502	399	403	398	457	361	408		14.71	14.28	18.34	15.91	19.27	18.15	15.81	16.09	18.87	19.73	18.87	17.8	19.18	19.34	17.59	17.91	17.98	20.21	17.61	22.12		0.41	0.38	0.37	0.34	0.36	0.37
Val	GTC	146	175	168	246	167	188	181	175	163	166	163	171	191	177	181	173	161	149	157	132		5.57	6.67	7.98	8.04	6.4	7.72	8.25	7.65	7.69	6.74	7.69	7.55	7.27	6.82	7.98	7.69	7.27	6.59	7.66	7.16		0.15	0.18	0.16	0.17	0.12	0.16
Trp	TGG	570	573	316	448	460	368	308	328	318	436	318	346	467	449	344	337	335	405	459	332		21.73	21.83	15.01	14.63	17.63	15.11	14.03	14.34	15	17.7	15	15.28	17.77	17.3	15.17	14.98	15.13	17.91	22.39	18		1	1	1	1	1	1
Tyr	TAT	902	892	616	826	799	724	610	696	621	740	621	677	798	791	600	668	665	691	644	572		34.38	33.98	29.26	26.98	30.62	29.73	27.79	30.44	29.29	30.04	29.29	29.9	30.36	30.47	26.45	29.68	30.03	30.55	31.41	31.01		0.7	0.68	0.71	0.66	0.82	0.74
Tyr	TAC	385	425	252	430	179	256	299	311	246	165	246	262	214	186	286	256	258	154	276	126		14.68	16.19	11.97	14.05	6.86	10.51	13.62	13.6	11.6	6.7	11.6	11.57	8.14	7.17	12.61	11.38	11.65	6.81	13.46	6.83		0.3	0.32	0.29	0.34	0.18	0.26
End	TGA	396	543	110	520	15	146	279	177	109	14	109	113	123	16	277	110	113	14	311	14		15.1	20.68	5.23	16.99	0.57	6	12.71	7.74	5.14	0.57	5.14	4.99	4.68	0.62	12.21	4.89	5.1	0.62	15.17	0.76		0.42	0.39	0.23	0.31	0.17	0.26
End	TAG	218	371	110	467	22	131	184	163	109	23	109	108	83	24	252	105	115	20	258	21		8.31	14.13	5.23	15.25	0.84	5.38	8.38	7.13	5.14	0.93	5.14	4.77	3.16	0.92	11.11	4.67	5.19	0.88	12.58	1.14		0.23	0.27	0.23	0.28	0.26	0.23
End	TAA	328	485	257	682	49	282	405	422	247	48	247	256	113	46	402	252	263	45	299	42		12.5	18.47	12.21	22.28	1.88	11.58	18.45	18.45	11.65	1.95	11.65	11.31	4.3	1.77	17.72	11.2	11.88	1.99	14.58	2.28		0.35	0.35	0.54	0.41	0.57	0.5
[truncated: 14 more columns]
